# Supplementary material
Source: publisher site journal article supplement (https://www.spandidos-publications.com/2141/downloadSupplementary)

Figure S1. Immunohistochemistry controls. (A) NST exhibiting strong positive staining for estrogen receptors. (B) Invasive micropapillary breast carcinoma stained negative for estrogen receptors. (C) NST exhibiting strong positive staining for progesterone receptors. (D) Invasive micropapillary breast carcinoma staining negative for progesterone receptors. Magnification, x200. NST, Invasive breast carcinoma.

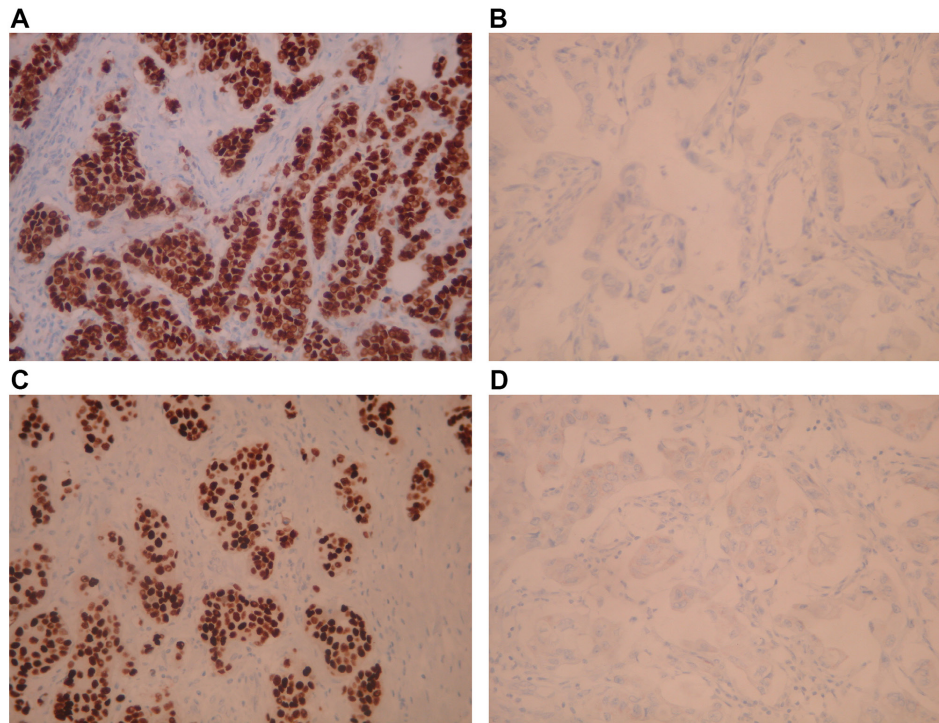

Supplement: Supplementary file 1 [file downloadSupplementary]
